# Supplementary material
Source: Springer Nature journal article supplement (https://www.springermedizin.de/resource/supplementary/13014_2005_7_MOESM9_ESM.pdf/9632806)

**Isodoses (Gy)**

**74.500**

**69.630**

**66.149**

**59.400**

**56.400**

**54.000**

**51.300**

**40.000**

**35.000**

**30.000**

**26.000**

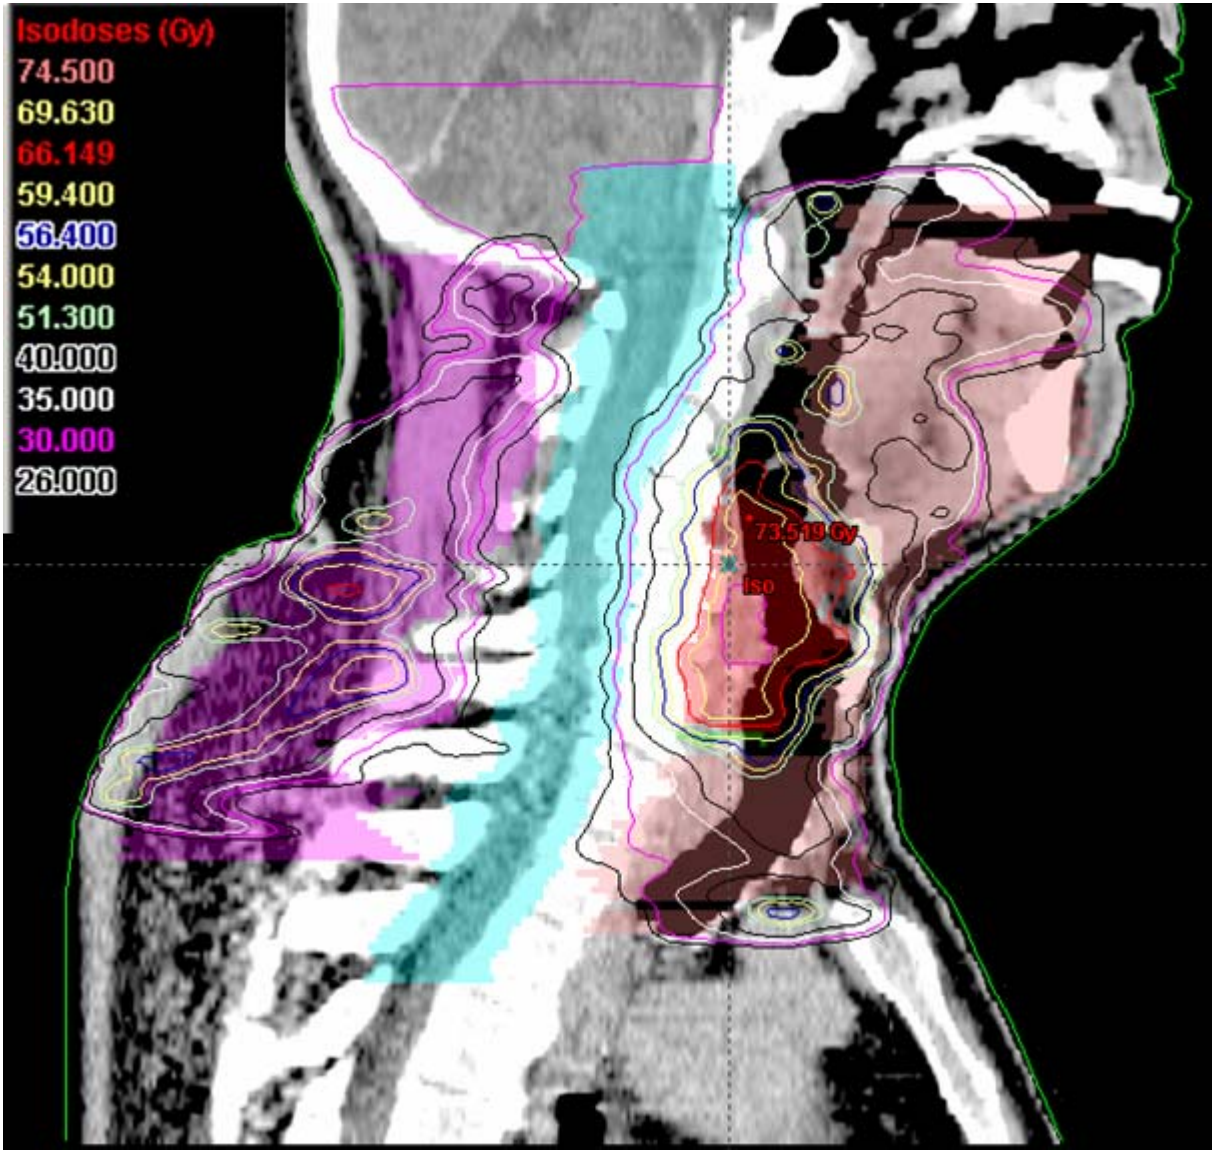

Supplement: MOESM9 [file 9632806]
